# Supplementary material for: Systematic Review: Drug Repositioning for Congenital Disorders of Glycosylation (CDG)
Source: MDPI journal article supplement (doi:10.3390/ijms23158725), 2022-08-05
Supplement: s1 [file s1]

## Supplementary file

### List of keywords used for literature search on current studies on CDG:

Therapies  
Therapy  
Therapeutic strategies  
Therapeutic options  
Acetazolamide  
Drug repositioning  
Animal models  
Yeast  
*Drosophila melanogaster*  
Zebrafish  
Mouse  
Rat  
Clinical trials  
Induced pluripotent stem cells  
Biomarkers  
AND  
Congenital disorders of glycosylation  
ALG1  
ALG1-CDG  
ALG6  
ALG6-CDG  
ALG13  
ALG13-CDG  
ATP6VAP1  
ATP6VAP1-CDG  
CAD  
CAD-CDG  
CCDC115  
CCDC115-CDG  
COG5  
COG5-CDG  
DOLK  
DOLK-CDG  
GNE  
GNE-CDG  
ISPD-CDG  
MAGT1  
MAGT1-CDG  
MPI  
MPI-CDG  
NANS  
NANS-CDG  
PGM1  
PGM1-CDG  
PGM3  
PGM3-CDG  
PIGM  
PIGM-CDG  
SL39A8  
SL39A8-CDG  
SLC35A2

SLC35A2-CDG  
SLC35C1  
SLC35C1-CDG  
SRD5A3  
SRD5A3-CDG  
TMEM165  
TMEM165-CDG  
PIGA  
PIGA-CDG  
PIGO  
PIGO-CDG  
PMM2-CDG
